# Supplementary material
Source: MDPI journal article supplement (https://www.mdpi.com/2072-4292/9/9/947)
Supplement: s1 [file s1]

**Supplementary Table.** Sensors, acquisition dates and time intervals of the satellite SAR image pairs considered for ice surface velocity estimation over the different study regions.

| Study Region          | Satellite Sensor | Acquisition Date 1 | Acquisition Date 2 | Time Interval |
|-----------------------|------------------|--------------------|--------------------|---------------|
| Canadian Arctic North | PALSAR-1         | 30/01/2007         | 17/03/2007         | 46 days       |
|                       |                  | 09/03/2007         | 24/04/2007         | 46 days       |
|                       |                  | 25/03/2007         | 10/05/2007         | 46 days       |
|                       |                  | 01/04/2007         | 17/05/2007         | 46 days       |
|                       |                  | 05/04/2007         | 21/05/2007         | 46 days       |
|                       |                  | 15/04/2007         | 31/05/2007         | 46 days       |
|                       |                  | 28/09/2007         | 13/11/2007         | 46 days       |
|                       |                  | 07/10/2007         | 22/11/2007         | 46 days       |
|                       |                  | 15/11/2008         | 31/12/2008         | 46 days       |
|                       |                  | 20/11/2007         | 05/01/2008         | 46 days       |
|                       | Sentinel-1       | 19/12/2010         | 03/02/2011         | 46 days       |
|                       |                  | 30/12/2010         | 14/02/2011         | 46 days       |
|                       |                  | 20/01/2011         | 07/03/2011         | 46 days       |
|                       |                  | 16/01/2015         | 28/01/2015         | 12 days       |
|                       |                  | 17/01/2015         | 29/01/2015         | 12 days       |
|                       |                  | 28/01/2015         | 09/02/2015         | 12 days       |
|                       |                  | 29/01/2015         | 10/02/2015         | 12 days       |
|                       |                  | 16/02/2016         | 28/02/2016         | 12 days       |
|                       |                  | 17/02/2016         | 29/02/2016         | 12 days       |
|                       |                  | 29/01/2017         | 10/02/2017         | 12 days       |
|                       |                  | 20/01/2017         | 11/02/2017         | 12 days       |
| Canadian Arctic South | PALSAR-1         | 25/03/2007         | 10/05/2007         | 46 days       |
|                       |                  | 10/09/2007         | 26/10/2007         | 46 days       |
|                       |                  | 17/09/2007         | 02/11/2007         | 46 days       |
|                       |                  | 07/10/2007         | 22/11/2007         | 46 days       |
|                       |                  | 17/11/2008         | 02/01/2009         | 46 days       |
|                       |                  | 20/11/2007         | 05/01/2008         | 46 days       |
|                       |                  | 15/11/2008         | 31/12/2008         | 46 days       |
|                       |                  | 09/10/2009         | 24/11/2009         | 46 days       |
|                       |                  | 21/12/2010         | 05/02/2011         | 46 days       |
|                       |                  | 08/01/2011         | 23/02/2011         | 46 days       |
|                       | Sentinel-1       | 10/01/2011         | 25/02/2011         | 46 days       |
|                       |                  | 07/01/2016         | 19/01/2016         | 12 days       |
|                       |                  | 10/02/2016         | 22/02/2016         | 12 days       |
|                       |                  | 13/02/2016         | 25/02/2016         | 12 days       |
|                       |                  | 14/02/2016         | 26/02/2016         | 12 days       |
|                       |                  | 19/01/2016         | 31/01/2016         | 12 days       |
|                       |                  | 22/02/2016         | 05/03/2016         | 12 days       |
|                       |                  | 25/02/2016         | 08/03/2016         | 12 days       |
| Svalbard              | JERS-1           | 23/03/1994         | 06/05/1994         | 44 days       |
|                       | PALSAR-1         | 11/12/1997         | 24/01/1998         | 44 days       |
|                       |                  | 04/09/2007         | 20/10/2007         | 46 days       |
|                       |                  | 05/01/2008         | 20/02/2008         | 46 days       |
|                       |                  | 01/02/2008         | 18/03/2008         | 46 days       |
|                       |                  | 08/06/2008         | 24/07/2008         | 46 days       |
|                       |                  | 23/05/2010         | 08/07/2010         | 46 days       |
|                       |                  | 12/06/2010         | 28/07/2010         | 46 days       |
|                       |                  | 28/07/2010         | 12/09/2010         | 46 days       |
|                       |                  | 02/09/2010         | 18/10/2010         | 46 days       |
|                       | TerraSAR-X       | 14/11/2010         | 14/02/2011         | 92 days       |
|                       |                  | 04/01/2011         | 19/02/2011         | 46 days       |
|                       |                  | 14/01/2011         | 01/03/2011         | 46 days       |
|                       |                  | 27/04/2008         | 08/05/2008         | 11 days       |
|                       | Radarsat-2       | 15/12/2012         | 26/12/2012         | 11 days       |
|                       |                  | 04/02/2016         | 28/02/2016         | 24 days       |
|                       | Sentinel-1       | 28/02/2016         | 23/03/2016         | 24 days       |
|                       |                  | 04/08/2014         | 21/08/2014         | 17 days       |
|                       |                  | 20/01/2015         | 01/02/2015         | 12 days       |
|                       |                  | 21/01/2015         | 02/02/2015         | 12 days       |
|                       |                  | 02/02/2015         | 14/02/2015         | 12 days       |
| Svalbard              | Sentinel-1       | 03/02/2015         | 15/02/2015         | 12 days       |
|                       |                  | 13/08/2015         | 25/08/2015         | 12 days       |

|          |            |            |            |         |
|----------|------------|------------|------------|---------|
|          |            | 14/08/2015 | 26/08/2015 | 12 days |
|          |            | 25/08/2015 | 06/09/2015 | 12 days |
|          |            | 26/08/2015 | 07/09/2015 | 12 days |
|          |            | 06/09/2015 | 18/09/2015 | 12 days |
|          |            | 07/09/2015 | 19/09/2015 | 12 days |
|          |            | 18/09/2015 | 30/09/2015 | 12 days |
|          |            | 19/09/2015 | 01/10/2015 | 12 days |
|          |            | 30/09/2015 | 12/10/2015 | 12 days |
|          |            | 01/10/2015 | 13/10/2015 | 12 days |
|          |            | 12/10/2015 | 24/10/2015 | 12 days |
|          |            | 13/10/2015 | 25/10/2015 | 12 days |
|          |            | 24/10/2015 | 05/11/2015 | 12 days |
|          |            | 25/10/2015 | 06/11/2015 | 12 days |
|          |            | 05/11/2015 | 17/11/2015 | 12 days |
|          |            | 06/11/2015 | 18/11/2015 | 12 days |
|          |            | 17/11/2015 | 29/11/2015 | 12 days |
|          |            | 18/11/2015 | 30/11/2015 | 12 days |
|          |            | 29/11/2015 | 11/12/2015 | 12 days |
|          |            | 30/11/2015 | 12/12/2015 | 12 days |
|          |            | 11/12/2015 | 23/12/2015 | 12 days |
|          |            | 12/12/2015 | 24/12/2015 | 12 days |
|          |            | 23/12/2015 | 04/01/2016 | 12 days |
|          |            | 24/12/2015 | 05/01/2016 | 12 days |
|          |            | 04/01/2016 | 16/01/2016 | 12 days |
|          |            | 05/01/2016 | 17/01/2016 | 12 days |
|          |            | 16/01/2016 | 28/01/2016 | 12 days |
|          |            | 17/01/2016 | 29/01/2016 | 12 days |
|          |            | 28/01/2016 | 09/02/2016 | 12 days |
|          |            | 29/01/2016 | 10/02/2016 | 12 days |
|          |            | 09/02/2016 | 21/02/2016 | 12 days |
|          |            | 10/02/2016 | 22/02/2016 | 12 days |
|          |            | 21/02/2016 | 04/03/2016 | 12 days |
|          |            | 22/02/2016 | 05/03/2016 | 12 days |
|          |            | 04/03/2016 | 16/03/2016 | 12 days |
|          |            | 05/03/2016 | 17/03/2016 | 12 days |
|          |            | 16/03/2016 | 28/03/2016 | 12 days |
|          |            | 17/03/2016 | 29/03/2016 | 12 days |
|          |            | 28/03/2016 | 09/04/2016 | 12 days |
|          |            | 29/03/2016 | 10/04/2016 | 12 days |
|          |            | 09/04/2016 | 21/04/2016 | 12 days |
|          |            | 10/04/2016 | 22/04/2016 | 12 days |
|          |            | 21/04/2016 | 03/05/2016 | 12 days |
|          |            | 22/04/2016 | 04/05/2016 | 12 days |
|          |            | 03/05/2016 | 15/05/2016 | 12 days |
|          |            | 04/05/2016 | 16/05/2016 | 12 days |
|          |            | 15/05/2016 | 27/05/2016 | 12 days |
|          |            | 16/05/2016 | 28/05/2016 | 12 days |
|          |            | 27/05/2016 | 08/06/2016 | 12 days |
|          |            | 28/05/2016 | 09/06/2016 | 12 days |
|          |            | 08/06/2016 | 20/06/2016 | 12 days |
|          |            | 09/06/2016 | 21/06/2016 | 12 days |
|          |            | 20/06/2016 | 02/07/2016 | 12 days |
|          |            | 21/06/2016 | 03/07/2016 | 12 days |
|          |            | 02/07/2016 | 14/07/2016 | 12 days |
|          |            | 03/07/2016 | 15/07/2016 | 12 days |
|          |            | 14/07/2016 | 26/07/2016 | 12 days |
|          |            | 15/07/2016 | 27/07/2016 | 12 days |
|          |            | 26/07/2016 | 07/08/2016 | 12 days |
|          |            | 27/07/2016 | 08/08/2016 | 12 days |
|          |            | 07/08/2016 | 19/08/2016 | 12 days |
|          |            | 08/08/2016 | 20/08/2016 | 12 days |
|          |            | 19/08/2016 | 31/08/2016 | 12 days |
|          |            | 20/08/2016 | 01/09/2016 | 12 days |
|          |            | 31/08/2016 | 12/09/2016 | 12 days |
|          |            | 01/09/2016 | 13/09/2016 | 12 days |
|          |            | 12/09/2016 | 24/09/2016 | 12 days |
|          |            | 13/09/2016 | 25/09/2016 | 12 days |
|          |            | 24/09/2016 | 06/10/2016 | 12 days |
|          |            | 25/09/2016 | 07/10/2016 | 12 days |
| Svalbard | Sentinel-1 |            |            |         |

|          |            |            |            |
|----------|------------|------------|------------|
|          | 01/10/2016 | 13/10/2016 | 12 days    |
|          | 06/10/2016 | 18/10/2016 | 12 days    |
|          | 07/10/2016 | 19/10/2016 | 12 days    |
|          | 13/10/2016 | 25/10/2016 | 12 days    |
|          | 18/10/2016 | 30/10/2016 | 12 days    |
|          | 19/10/2016 | 31/10/2016 | 12 days    |
|          | 24/10/2016 | 05/11/2016 | 12 days    |
|          | 25/10/2016 | 06/11/2016 | 12 days    |
|          | 30/10/2016 | 11/11/2016 | 12 days    |
|          | 31/10/2016 | 12/11/2016 | 12 days    |
|          | 05/11/2016 | 17/11/2016 | 12 days    |
|          | 06/11/2016 | 18/11/2016 | 12 days    |
|          | 11/11/2016 | 23/11/2016 | 12 days    |
|          | 12/11/2016 | 24/11/2016 | 12 days    |
|          | 17/11/2016 | 29/11/2016 | 12 days    |
|          | 18/11/2016 | 30/11/2016 | 12 days    |
|          | 23/11/2016 | 05/12/2016 | 12 days    |
|          | 24/11/2016 | 06/12/2016 | 12 days    |
|          | 29/11/2016 | 11/12/2016 | 12 days    |
|          | 30/11/2016 | 12/12/2016 | 12 days    |
|          | 05/12/2016 | 17/12/2016 | 12 days    |
|          | 06/12/2016 | 18/12/2016 | 12 days    |
|          | 11/12/2016 | 23/12/2016 | 12 days    |
|          | 12/12/2016 | 24/12/2016 | 12 days    |
|          | 17/12/2016 | 29/12/2016 | 12 days    |
|          | 18/12/2016 | 30/12/2016 | 12 days    |
|          | 23/12/2016 | 04/01/2017 | 12 days    |
|          | 24/12/2016 | 05/01/2017 | 12 days    |
|          | 29/12/2016 | 10/01/2017 | 12 days    |
|          | 30/12/2016 | 11/01/2017 | 12 days    |
|          | 04/01/2017 | 16/01/2017 | 12 days    |
|          | 05/01/2017 | 17/01/2017 | 12 days    |
|          | 11/01/2017 | 23/01/2017 | 12 days    |
|          | 16/01/2017 | 28/01/2017 | 12 days    |
|          | 17/01/2017 | 29/01/2017 | 12 days    |
|          | 23/01/2017 | 04/02/2017 | 12 days    |
|          | 28/01/2017 | 09/02/2017 | 12 days    |
|          | 29/01/2017 | 10/02/2017 | 12 days    |
|          | 03/02/2017 | 15/02/2017 | 12 days    |
|          | 04/02/2017 | 16/02/2017 | 12 days    |
|          | 09/02/2017 | 21/02/2017 | 12 days    |
|          | 10/02/2017 | 22/02/2017 | 12 days    |
|          | 15/02/2017 | 27/02/2017 | 12 days    |
|          | 16/02/2017 | 28/02/2017 | 12 days    |
|          | 21/02/2017 | 05/03/2017 | 12 days    |
|          | 22/02/2017 | 06/03/2017 | 12 days    |
|          | 27/02/2017 | 11/03/2017 | 12 days    |
|          | 28/02/2017 | 12/03/2017 | 12 days    |
|          | 05/03/2017 | 17/03/2017 | 12 days    |
|          | 06/03/2017 | 18/03/2017 | 12 days    |
|          | 11/03/2017 | 23/03/2017 | 12 days    |
|          | 12/03/2017 | 24/03/2017 | 12 days    |
|          | 17/03/2017 | 29/03/2017 | 12 days    |
|          | 18/03/2017 | 30/03/2017 | 12 days    |
|          | 23/03/2017 | 04/04/2017 | 12 days    |
|          | 24/03/2017 | 05/04/2017 | 12 days    |
|          | 29/03/2017 | 10/04/2017 | 12 days    |
|          | 30/03/2017 | 11/04/2017 | 12 days    |
|          | 04/04/2017 | 16/04/2017 | 12 days    |
|          | 05/04/2017 | 17/04/2017 | 12 days    |
|          | 10/04/2017 | 22/04/2017 | 12 days    |
|          | 11/04/2017 | 23/04/2017 | 12 days    |
|          | 16/04/2017 | 28/04/2017 | 12 days    |
|          | 17/04/2017 | 29/04/2017 | 12 days    |
|          | 22/04/2017 | 04/05/2017 | 12 days    |
|          | 23/04/2017 | 05/05/2017 | 12 days    |
|          | 28/04/2017 | 10/05/2017 | 12 days    |
|          | 29/04/2017 | 11/05/2017 | 12 days    |
| Svalbard | Sentinel-1 | 04/05/2017 | 16/05/2017 |

|                  |            |            |            |         |
|------------------|------------|------------|------------|---------|
|                  |            | 05/05/2017 | 17/05/2017 | 12 days |
|                  |            | 10/05/2017 | 22/05/2017 | 12 days |
|                  |            | 11/05/2017 | 23/05/2017 | 12 days |
|                  |            | 16/05/2017 | 28/05/2017 | 12 days |
|                  |            | 17/05/2017 | 29/05/2017 | 12 days |
| Novaya Zemlya    | JERS-1     | 28/01/1998 | 13/03/1998 | 44 days |
|                  | PALSAR-1   | 11/12/2008 | 26/01/2009 | 46 days |
|                  |            | 25/12/2008 | 09/02/2009 | 46 days |
|                  |            | 31/12/2008 | 15/02/2009 | 46 days |
|                  |            | 02/01/2009 | 17/02/2009 | 46 days |
|                  |            | 04/01/2009 | 19/02/2009 | 46 days |
|                  |            | 14/01/2009 | 01/03/2009 | 46 days |
|                  |            | 16/01/2009 | 03/03/2009 | 46 days |
|                  |            | 18/01/2009 | 05/03/2009 | 46 days |
|                  |            | 22/01/2009 | 09/03/2009 | 46 days |
|                  |            | 14/03/2010 | 29/04/2010 | 46 days |
|                  | Sentinel-1 | 16/10/2016 | 28/10/2016 | 12 days |
|                  |            | 25/10/2016 | 06/11/2016 | 12 days |
|                  |            | 28/10/2016 | 09/11/2016 | 12 days |
|                  |            | 06/11/2016 | 18/11/2016 | 12 days |
|                  |            | 09/11/2016 | 21/11/2016 | 12 days |
|                  |            | 18/11/2016 | 30/11/2016 | 12 days |
|                  |            | 21/11/2016 | 03/12/2016 | 12 days |
|                  |            | 30/11/2016 | 12/12/2016 | 12 days |
|                  |            | 03/12/2016 | 15/12/2016 | 12 days |
|                  |            | 12/12/2016 | 24/12/2016 | 12 days |
|                  |            | 15/12/2016 | 27/12/2016 | 12 days |
|                  |            | 24/12/2016 | 05/01/2017 | 12 days |
|                  |            | 27/12/2016 | 08/01/2017 | 12 days |
|                  |            | 05/01/2017 | 17/01/2017 | 12 days |
|                  |            | 08/01/2017 | 20/01/2017 | 12 days |
|                  |            | 17/01/2017 | 29/01/2017 | 12 days |
|                  |            | 20/01/2017 | 01/02/2017 | 12 days |
|                  |            | 29/01/2017 | 10/02/2017 | 12 days |
|                  |            | 01/02/2017 | 13/02/2017 | 12 days |
|                  |            | 10/02/2017 | 22/02/2017 | 12 days |
|                  |            | 13/02/2017 | 25/02/2017 | 12 days |
|                  |            | 25/02/2017 | 09/03/2017 | 12 days |
|                  |            | 09/03/2017 | 21/03/2017 | 12 days |
|                  |            | 18/03/2017 | 30/03/2017 | 12 days |
|                  |            | 21/03/2017 | 02/04/2017 | 12 days |
|                  |            | 30/03/2017 | 11/04/2017 | 12 days |
|                  |            | 11/04/2017 | 23/04/2017 | 12 days |
|                  |            | 23/04/2017 | 05/05/2017 | 12 days |
|                  |            | 26/04/2017 | 08/05/2017 | 12 days |
|                  |            | 05/05/2017 | 17/05/2017 | 12 days |
|                  |            | 08/05/2017 | 20/05/2017 | 12 days |
|                  |            | 17/05/2017 | 29/05/2017 | 12 days |
| Franz-Josef Land | JERS-1     | 06/01/1998 | 19/02/1998 | 44 days |
|                  | PALSAR-1   | 22/12/2010 | 06/02/2011 | 46 days |
|                  | Sentinel-1 | 24/10/2016 | 05/11/2016 | 12 days |
|                  |            | 27/10/2016 | 08/11/2016 | 12 days |
|                  |            | 05/11/2016 | 17/11/2016 | 12 days |
|                  |            | 08/11/2016 | 20/11/2016 | 12 days |
|                  |            | 17/11/2016 | 29/11/2016 | 12 days |
|                  |            | 20/11/2016 | 02/12/2016 | 12 days |
|                  |            | 29/11/2016 | 11/12/2016 | 12 days |
|                  |            | 02/12/2016 | 14/12/2016 | 12 days |
|                  |            | 11/12/2016 | 23/12/2016 | 12 days |
|                  |            | 14/12/2016 | 26/12/2016 | 12 days |
|                  |            | 23/12/2016 | 04/01/2017 | 12 days |
|                  |            | 26/12/2016 | 07/01/2017 | 12 days |
|                  |            | 04/01/2017 | 16/01/2017 | 12 days |
|                  |            | 07/01/2017 | 19/01/2017 | 12 days |
|                  |            | 16/01/2017 | 28/01/2017 | 12 days |
|                  |            | 19/01/2017 | 31/01/2017 | 12 days |
|                  |            | 28/01/2017 | 09/02/2017 | 12 days |
|                  |            | 31/01/2017 | 12/02/2017 | 12 days |
| Franz-Josef      | Sentinel-1 |            |            |         |

|                  |            |  |            |            |         |
|------------------|------------|--|------------|------------|---------|
| Land             |            |  | 09/02/2017 | 21/02/2017 | 12 days |
|                  |            |  | 12/02/2017 | 24/02/2017 | 12 days |
|                  |            |  | 21/02/2017 | 05/03/2017 | 12 days |
|                  |            |  | 24/02/2017 | 08/03/2017 | 12 days |
|                  |            |  | 05/03/2017 | 17/03/2017 | 12 days |
|                  |            |  | 08/03/2017 | 20/03/2017 | 12 days |
|                  |            |  | 17/03/2017 | 29/03/2017 | 12 days |
|                  |            |  | 20/03/2017 | 01/04/2017 | 12 days |
|                  |            |  | 29/03/2017 | 10/04/2017 | 12 days |
|                  |            |  | 01/04/2017 | 13/04/2017 | 12 days |
|                  |            |  | 10/04/2017 | 22/04/2017 | 12 days |
|                  |            |  | 13/04/2017 | 25/04/2017 | 12 days |
|                  |            |  | 22/04/2017 | 04/05/2017 | 12 days |
|                  |            |  | 25/04/2017 | 07/05/2017 | 12 days |
|                  |            |  | 04/05/2017 | 16/05/2017 | 12 days |
|                  |            |  | 07/05/2017 | 19/05/2017 | 12 days |
|                  |            |  | 16/05/2017 | 28/05/2017 | 12 days |
|                  |            |  | 19/05/2017 | 31/05/2017 | 12 days |
| Severnaya Zemlya | PALSAR-1   |  | 04/07/2010 | 19/08/2010 | 46 days |
|                  |            |  | 18/07/2010 | 02/09/2010 | 46 days |
|                  |            |  | 01/11/2010 | 17/12/2010 | 46 days |
|                  | PALSAR-2   |  | 03/01/2015 | 17/01/2015 | 14 days |
|                  |            |  | 12/08/2015 | 26/08/2015 | 14 days |
|                  |            |  | 04/08/2016 | 18/08/2016 | 14 days |
|                  | Radarsat-2 |  | 13/10/2016 | 27/10/2016 | 14 days |
|                  |            |  | 26/11/2016 | 12/20/2016 | 24 days |
|                  |            |  | 20/12/2016 | 13/01/2017 | 24 days |
|                  | Sentinel-1 |  | 13/01/2017 | 06/02/2017 | 24 days |
|                  |            |  | 16/10/2016 | 09/11/2016 | 24 days |
|                  |            |  | 19/10/2016 | 12/11/2016 | 24 days |
|                  |            |  | 22/10/2016 | 15/11/2016 | 24 days |
|                  |            |  | 06/11/2016 | 30/11/2016 | 24 days |
|                  |            |  | 09/11/2016 | 03/12/2016 | 24 days |
|                  |            |  | 12/11/2016 | 06/12/2016 | 24 days |
|                  |            |  | 15/11/2016 | 09/12/2016 | 24 days |
|                  |            |  | 30/11/2016 | 12/12/2016 | 12 days |
|                  |            |  | 03/12/2016 | 15/12/2016 | 12 days |
|                  |            |  | 06/12/2016 | 18/12/2016 | 12 days |
|                  |            |  | 09/12/2016 | 21/12/2016 | 12 days |
|                  |            |  | 12/12/2016 | 24/12/2016 | 12 days |
|                  |            |  | 15/12/2016 | 27/12/2016 | 12 days |
|                  |            |  | 18/12/2016 | 30/12/2016 | 12 days |
|                  |            |  | 21/12/2016 | 02/01/2017 | 12 days |
|                  |            |  | 24/12/2016 | 05/01/2017 | 12 days |
|                  |            |  | 27/12/2016 | 08/01/2017 | 12 days |
|                  |            |  | 30/12/2016 | 11/01/2017 | 12 days |
|                  |            |  | 02/01/2017 | 14/01/2017 | 12 days |
|                  |            |  | 05/01/2017 | 17/01/2017 | 12 days |
|                  |            |  | 08/01/2017 | 20/01/2017 | 12 days |
|                  |            |  | 11/01/2017 | 23/01/2017 | 12 days |
|                  |            |  | 14/01/2017 | 26/01/2017 | 12 days |
|                  |            |  | 17/01/2017 | 29/01/2017 | 12 days |
|                  |            |  | 20/01/2017 | 01/02/2017 | 12 days |
|                  |            |  | 23/01/2017 | 04/02/2017 | 12 days |
|                  |            |  | 26/01/2017 | 07/02/2017 | 12 days |
|                  |            |  | 29/01/2017 | 10/02/2017 | 12 days |
|                  |            |  | 01/02/2017 | 13/02/2017 | 12 days |
|                  |            |  | 04/02/2017 | 16/02/2017 | 12 days |
|                  |            |  | 07/02/2017 | 19/02/2017 | 12 days |
|                  |            |  | 10/02/2017 | 22/02/2017 | 12 days |
|                  |            |  | 13/02/2017 | 25/02/2017 | 12 days |
|                  |            |  | 16/02/2017 | 28/02/2017 | 12 days |
|                  |            |  | 19/02/2017 | 03/03/2017 | 12 days |
|                  |            |  | 22/02/2017 | 06/03/2017 | 12 days |
|                  |            |  | 25/02/2017 | 09/03/2017 | 12 days |
|                  |            |  | 28/02/2017 | 12/03/2017 | 12 days |
|                  |            |  | 03/03/2017 | 15/03/2017 | 12 days |
| Severnaya Zemlya | Sentinel-1 |  | 06/03/2017 | 18/03/2017 | 12 days |
|                  |            |  | 09/03/2017 | 21/03/2017 | 12 days |
|                  |            |  |            |            |         |

|            |            |         |
|------------|------------|---------|
| 12/03/2017 | 24/03/2017 | 12 days |
| 18/03/2017 | 30/03/2017 | 12 days |
| 21/03/2017 | 02/04/2017 | 12 days |
| 24/03/2017 | 05/04/2017 | 12 days |
| 30/03/2017 | 11/04/2017 | 12 days |
| 05/04/2017 | 17/04/2017 | 12 days |
| 15/03/2017 | 20/04/2017 | 36 days |
| 11/04/2017 | 23/04/2017 | 12 days |
| 02/04/2017 | 26/04/2017 | 24 days |
| 20/04/2017 | 02/05/2017 | 12 days |
| 23/04/2017 | 05/05/2017 | 12 days |
| 17/04/2017 | 11/05/2017 | 24 days |
| 02/05/2017 | 14/05/2017 | 12 days |
| 05/05/2017 | 17/05/2017 | 12 days |
| 26/04/2017 | 20/05/2017 | 24 days |
| 11/05/2017 | 23/05/2017 | 12 days |
| 14/05/2017 | 26/05/2017 | 12 days |
| 17/05/2017 | 29/05/2017 | 12 days |
| 20/05/2017 | 01/06/2017 | 12 days |

---
